# Supplementary material
Source: PubMed Central journal article supplement (PMC3134308)
Supplement: NIHMS298146-supplement-1_si_001.pdf [file NIHMS298146-supplement-1_si_001.pdf]

# **Conformational folding and stability of HET-C2 glycolipid transfer protein (GLTP)-fold: Does a molten globule-like state regulate activity?<sup>†</sup>**

Roopa Kenoth<sup>1,‡</sup>, Ravi Kanth Kamlekar<sup>1,‡</sup>, Dhirendra K. Simanshu<sup>2,‡</sup>, Yongguang Gao<sup>1</sup>,  
Lucy Malinina<sup>3</sup>, Franklyn G. Prendergast<sup>4</sup>, Julian G. Molotkovsky<sup>5</sup>,  
Dinshaw J. Patel<sup>2,\*</sup>, Sergei Y. Venyaminov<sup>4,\*</sup>, and Rhoderick E. Brown<sup>1,\*</sup>

<sup>1</sup>The Hormel Institute, University of Minnesota, Austin, Minnesota;

<sup>2</sup>Structural Biology Program, Memorial Sloan-Kettering Cancer Center, New York, New York;

<sup>3</sup>Structural Biology, CIC bioGUNE, Derio, Spain;

<sup>4</sup>Mayo Clinic College of Medicine, Rochester, Minnesota;

<sup>5</sup>Shemyakin and Ovchinnikov Institute of Bioorganic Chemistry,  
Russian Academy of Sciences, Moscow, Russia

**Supplemental Information for Publication**

**Table S1.** Secondary structure calculations of HET-C2 at various pH values from far-UV CD spectra

| pH                       |                  | 2.0        | 3.0      | 4.0      | 5.0      | 6.0      | 7.4      | 9.0      | 10.0     |
|--------------------------|------------------|------------|----------|----------|----------|----------|----------|----------|----------|
| Helix                    | <i>regular</i>   | 30.8 ± 3.7 | 33.3±5.3 | 36.0±4.1 | 36.4±4.1 | 35.6±4.0 | 37.4±4.6 | 37.0±2.2 | 34.9±4.5 |
|                          | <i>distorted</i> | 20.6 ± 0.9 | 21.6±2.4 | 24.4±2.4 | 24.0±2.0 | 23.0±2.4 | 22.7±2.7 | 22.5±2.2 | 21.4±2.9 |
|                          | <i>total</i>     | 51.4 ± 3.9 | 54.9±6.9 | 60.4±2.6 | 60.4±2.6 | 58.6±3.1 | 60.1±4.3 | 59.5±4.9 | 56.3±5.6 |
| β-strand                 | <i>regular</i>   | 3.7 ± 2.9  | 3.7±2.9  | 3.4±2.4  | 4.2±2.0  | 4.6±2.1  | 3.9±2.8  | 4.2±2.6  | 4.2±2.4  |
|                          | <i>distorted</i> | 4.5 ± 1.5  | 4.0±1.5  | 4.0±2.2  | 4.1±1.9  | 4.4±1.9  | 4.0±1.8  | 4.4±1.9  | 4.5±1.6  |
|                          | <i>total</i>     | 8.2 ± 4.2  | 7.7±4.0  | 7.4±4.4  | 8.3±3.6  | 9.0±3.8  | 7.9±4.4  | 8.6±4.4  | 8.7±3.6  |
| Turns                    |                  | 14.3 ± 3.5 | 13.0±3.3 | 13.1±2.9 | 12.7±3.3 | 12.6±3.9 | 11.1±3.6 | 11.7±3.9 | 12.5±3.8 |
| Unordered                |                  | 28.1 ± 1.5 | 24.9±4.0 | 20.5±3.2 | 20.6±2.2 | 22.7±2.5 | 22.9±4.1 | 22.2±3.3 | 24.5±4.2 |
| # of helical segments    |                  | 10.7 ± 0.4 | 11.2±1.2 | 12.7±1.2 | 12.5±1.1 | 12.0±1.2 | 11.8±1.4 | 11.7±1.2 | 11.2±1.5 |
| Average helix length     |                  | 10.0 ± 0.7 | 10.2±0.8 | 10.0±1.2 | 10.1±1.2 | 10.3±1.1 | 10.8±1.4 | 10.7±1.2 | 10.6±1.1 |
| # of β-strands           |                  | 4.7 ± 1.5  | 4.1±1.5  | 4.1±2.1  | 4.3±1.9  | 4.5±1.9  | 4.1±1.8  | 4.6±1.9  | 4.7±1.6  |
| Average β-strand length  |                  | 3.5 ± 1.2  | 3.7±1.0  | 3.6±0.7  | 3.6±0.8  | 3.6±0.9  | 3.9±1.0  | 3.9±0.9  | 3.8±0.9  |
| Tertiary structure class |                  | α + β      | α + β    | α + β    | α + β    | α + β    | α + β    | α + β    | α + β    |

\* *helix regular* or *β-strand regular*: fraction of residues (%) in central part of helical segments or strands; *helix distorted* or *β-strand distorted*: fraction of terminus residues (%) in helices (two at each end of helix, total of four per helical segment) or β-strands (one residue at each end of strand, total of two per strand); *total*: *regular* + *distorted*; *average length of helix* or *β-strand*: average number of residues per helix or β-strand, translation per one residue = 1.5 Å for α-helix and 3.3 Å for β-strand

Secondary structure was calculated from far-UV CD spectra as detailed previously (18,25) using the CDPro software package, which is a modified version of three methods: SELCON3, CONTINLL locally linearized approximation of CONTIN, and CDSSTR, using set of 48 reference proteins or 22 α+β reference proteins selected by the CLUSTER program. Tertiary structure class was determined by CLUSTER program. 6 values for each type of secondary structure (three methods of calculation × two sets of reference proteins) were averaged and the average values ± root-mean-square deviation are presented.

Secondary structure classification was determined with the DSSP program. Output included α-helix (H), <sub>310</sub>-helix (G), β-sheet (E), β-bridges (B), turns (T), and bends (S), which were further grouped as follows: the α- and <sub>310</sub>-helix were treated in CDPro as helix; β-sheet as β-strand; turns and bends were treated as turns; a minimum of two adjacent residues were required for such grouping for turns and bends. Single residues assigned to a structure (such as β-bridges, turns, and bends) were grouped as unordered, which contains residues that are not assigned to any defined structural class.

Figure S1

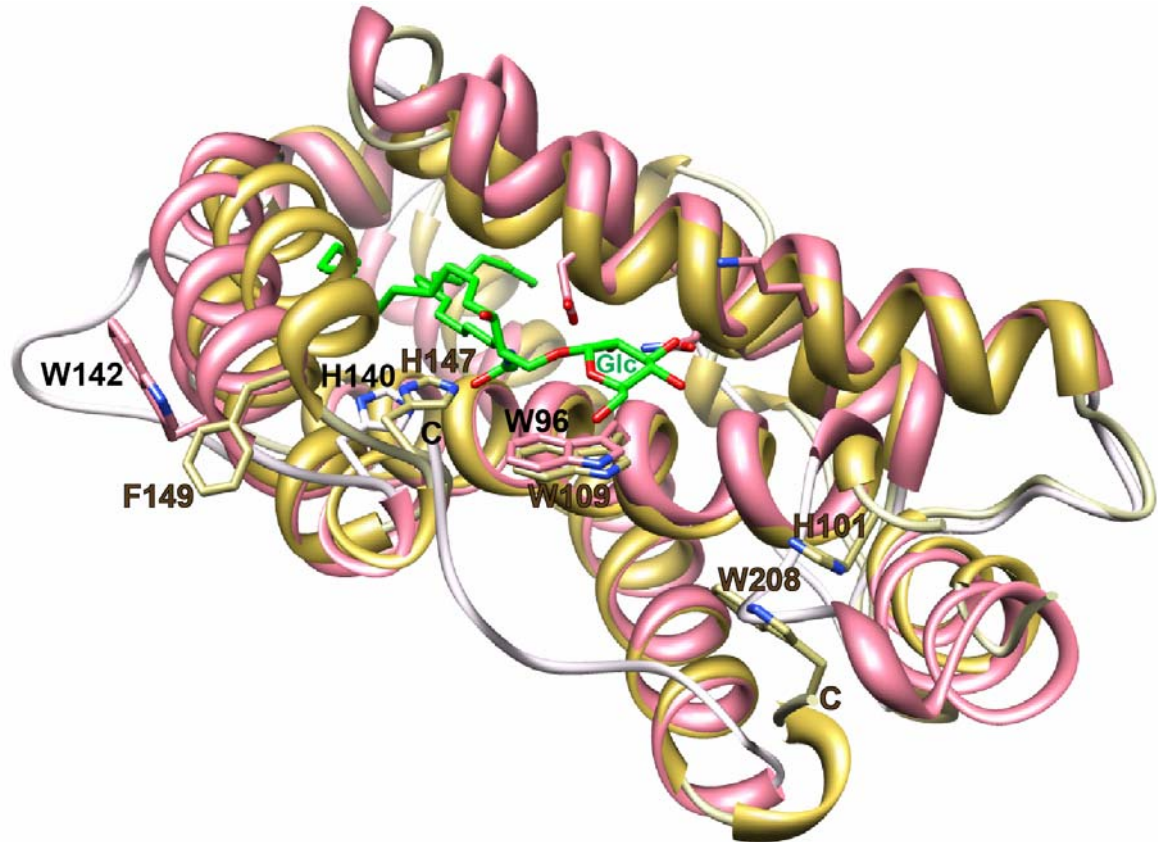

**GLTP-folds of HET-C2 and GLTP.** Superpositioning of HET-C2 (gold; PDB 3kv0) and human GLTP structures (cameo pink; PDB 1sx6 ) determined by X-ray diffraction. The glucosylceramide (green) in the GLTP-fold binding pocket is adapted from 1sx6. Outward displacement of helix-6 (left) occurs in GLTP during accommodation of glycolipid. Residues labeled in brown refer to HET-C2 while those in labeled in black refer to GLTP. Although the two core structures are very similar, the C-terminal (**C** and **C**) and N-terminal regions of each protein are strikingly different.

Figure S2

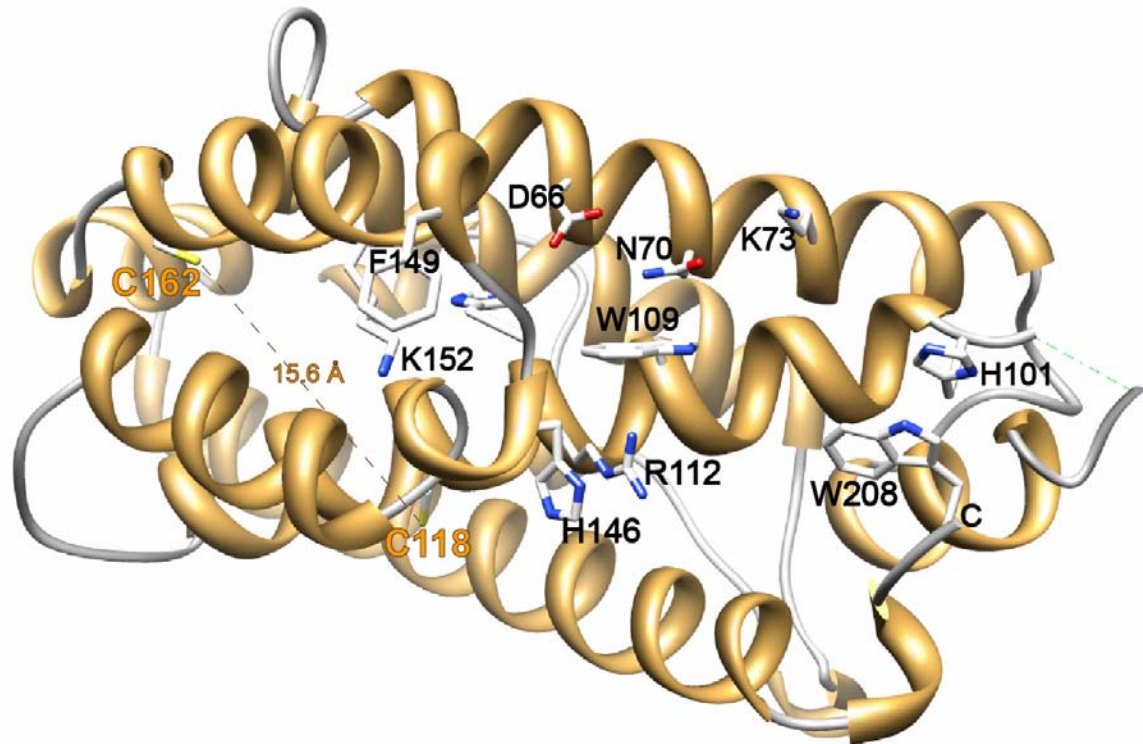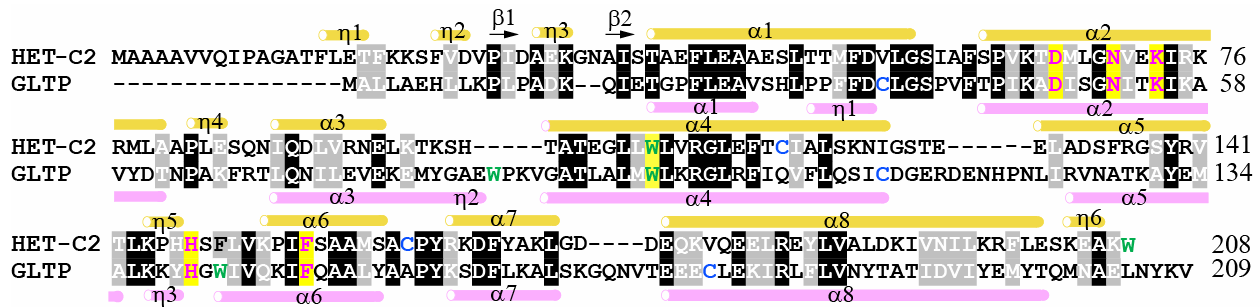

**Cysteine localization in HET-C2 and GLTP.** In HET-C2 (gold), the two cysteine residues (blue), Cys<sup>162</sup> and Cys<sup>118</sup>, are too far apart (~15.6 Å) to stabilize conformation via disulfide bridging, as revealed by the crystal structure [PDB 3kv0; (18)]. In GLTP (cameo pink), the three cysteine residues (blue) also are too far apart to undergo intramolecular disulfide bridging, e.g. Cys<sup>36</sup>↔Cys<sup>112</sup> = 14 Å; Cys<sup>112</sup>↔Cys<sup>176</sup> = 8 Å; Cys<sup>36</sup>↔Cys<sup>176</sup> = 9.3 Å [PDB 1swx; (19)]. Trp residues are green and key sugar headgroup anchoring residues are red and yellow highlighted.

**Figure S3**

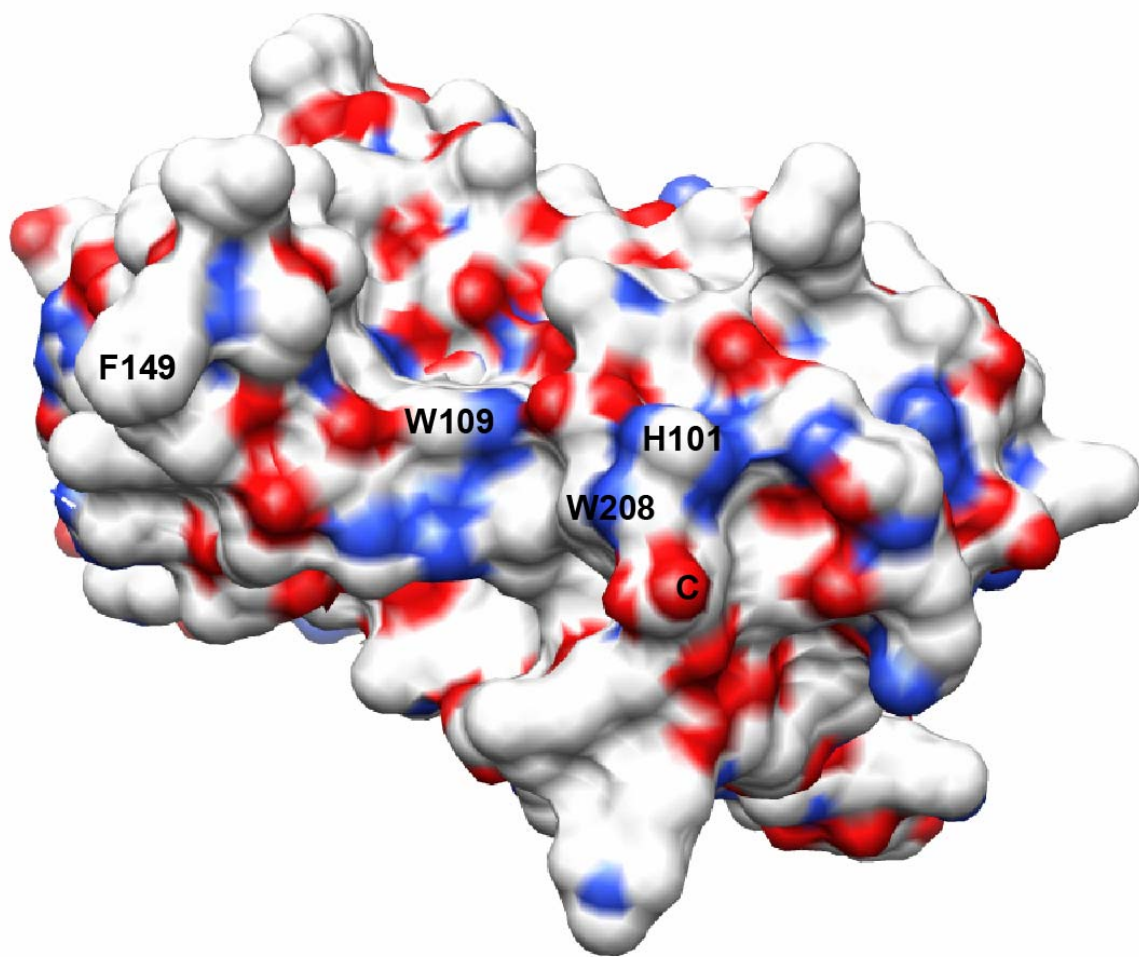

**The surface accessibility of the two intrinsic Trp residues of HET-C2.** Space-filling rendition of HET-C2 derived from [PDB 3kv0; (18)]. Electrostatic surface charges are shown in blue for positive residues and in red for negative residues.
